# Supplementary material for: IgG4-related disease: what a hematologist needs to know
Source: PubMed Central journal article supplement — Haematologica. 2019 Jan 31;104(3):444–55. doi: 10.3324/haematol.2018.205526 (PMC6395313; doi:10.3324/haematol.2018.205526), 2019-03
Supplement: 2018_205526-Disclosures_and_Contributions.pdf [file 2018_205526-Disclosures_and_Contributions.pdf]

Haematologica  
HAEMATOL/2018/205526  
Version 3

IgG4-related disease: what a hematologist needs to know

Luke Y. C. Chen, Andre Mattman, Michael A. Seidman, and Mollie N.  
Carruthers

Disclosures: none

Contributions: All authors wrote and edited the review; AM and MS also provided serum protein and histological figures respectively.
