# Supplementary figures and images for: IgG4-related disease: what a hematologist needs to know
Source: PubMed Central journal article supplement — Haematologica. 2019 Jan 31;104(3):444–55. doi: 10.3324/haematol.2018.205526 (PMC6395313; doi:10.3324/haematol.2018.205526), 2019-03

# Hematological manifestations of IgG4-related disease

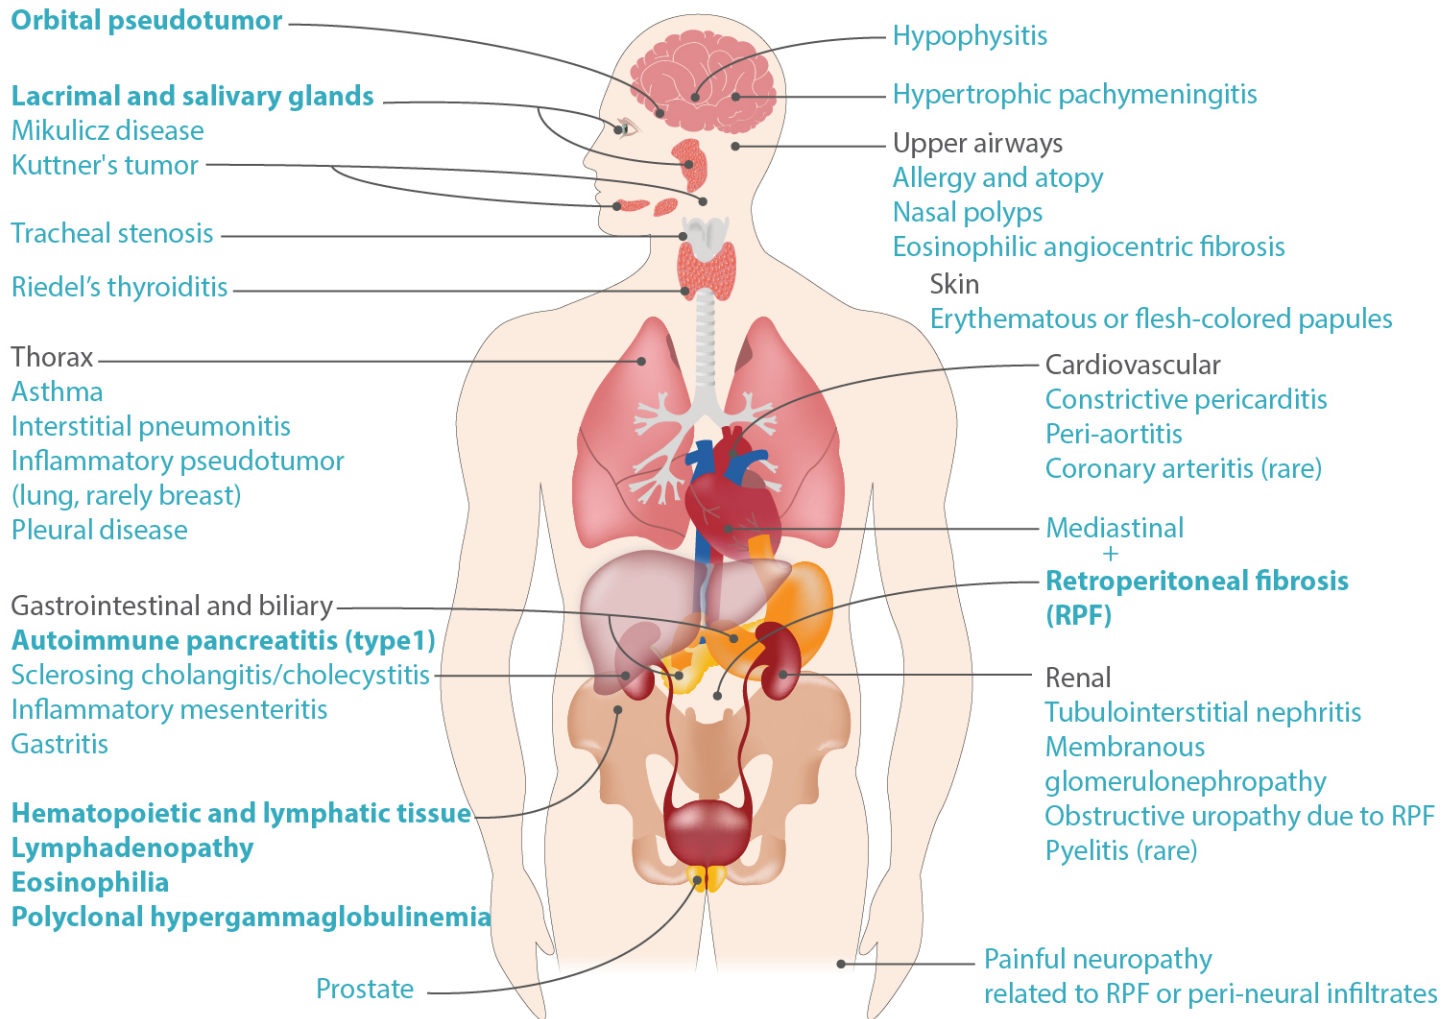

Supplement: HAEMATOL-2018-205526v3-Chen-01.pdf [file HAEMATOL-2018-205526v3-Chen-01.pdf]
